# Supplementary material for: Developing and Evaluating JIApp: Acceptability and Usability of a Smartphone App System to Improve Self-Management in Young People With Juvenile Idiopathic Arthritis
Source: PubMed Central journal article supplement (PMC5575419; doi:10.2196/mhealth.7229), 2017-08-15
Supplement: mhealth_v5i8e121_app2.pdf [file mhealth_v5i8e121_app2.pdf]

|                                                                              | Strongly disagree |   |   |   | Strongly agree |
|------------------------------------------------------------------------------|-------------------|---|---|---|----------------|
| <b>Usability</b>                                                             |                   |   |   |   |                |
| 1) Overall it was easy to use this application.                              | 1                 | 2 | 3 | 4 | 5              |
| 2) I was able to complete the tasks quickly using this application.          | 1                 | 2 | 3 | 4 | 5              |
| 3) I felt comfortable using this application                                 | 1                 | 2 | 3 | 4 | 5              |
| 4) It was easy and quick for me to find the information I needed.            | 1                 | 2 | 3 | 4 | 5              |
| 5) The organization of information on the application screen was clear.      | 1                 | 2 | 3 | 4 | 5              |
| <b>Acceptability</b>                                                         |                   |   |   |   |                |
| 6) The application looked pleasant (e.g., pictures, words, style etc.)       | 1                 | 2 | 3 | 4 | 5              |
| 7) The application was fun to use.                                           | 1                 | 2 | 3 | 4 | 5              |
| 8) I found this application useful for me.                                   | 1                 | 2 | 3 | 4 | 5              |
| 9) Overall, I am satisfied with this application.                            | 1                 | 2 | 3 | 4 | 5              |
| 10) I would recommend this application to other young people with arthritis. | 1                 | 2 | 3 | 4 | 5              |

**Multimedia Appendix 2: Usability questionnaire**
